# Supplementary material for: Estimating the reproductive number and the outbreak size of COVID-19 in Korea
Source: PubMed Central journal article supplement (PMC7285447; doi:10.4178/epih.e2020011), 2020-03-12
Supplement: epih-42-e2020011-app1.pdf [file epih-42-e2020011-app1.pdf]

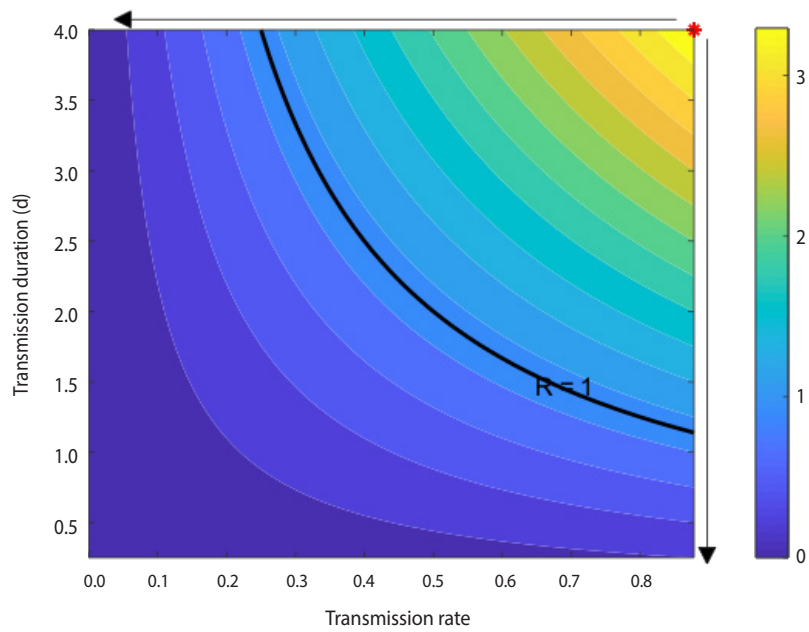

**Appendix 1.** A contour map of the reproductive number ( $R$ ) as transmission rate and transmission duration changes.  $R=3.5$  (red spot) and  $R=1$  (black line).
