# Supplementary material for: Estimating the reproductive number and the outbreak size of COVID-19 in Korea
Source: PubMed Central journal article supplement (PMC7285447; doi:10.4178/epih.e2020011), 2020-03-12
Supplement: epih-42-e2020011-app2.pdf [file epih-42-e2020011-app2.pdf]

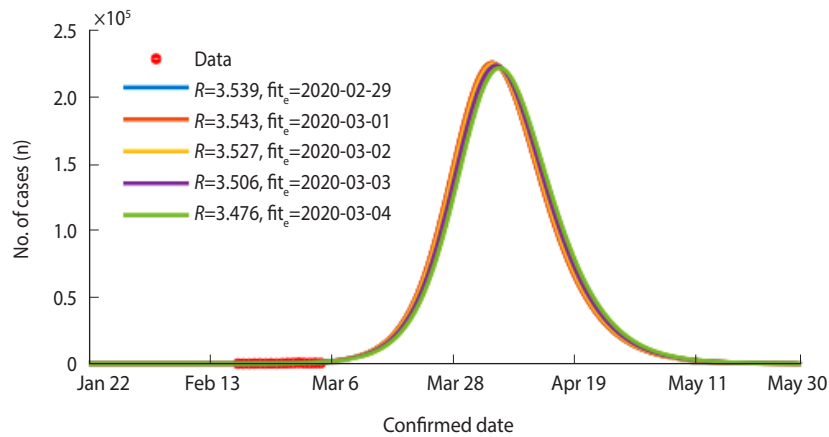

**Appendix 2.** Estimated reproductive number ( $R$ ) and daily number of confirmed patients in Daegu and North Gyeongsang Province at base scenario which means no preventive measures.  $R$  varies with fitting period. Number of cases (red dots) and model fitting curves (colored lines).

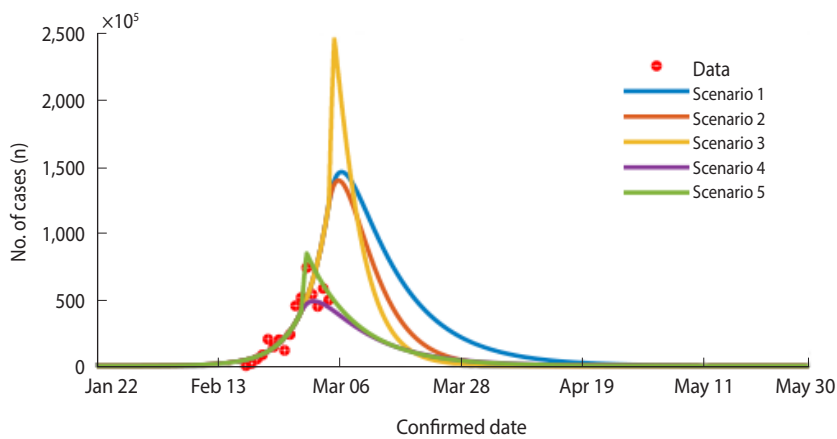

**Appendix 3.** Estimated daily number of confirmed patients by scenario in Daegu and North Gyeongsang Province. See Table 2 for scenarios. Number of cases (red dots) and model fitting curves (colored lines).
