# Supplementary material for: Estimating the reproductive number and the outbreak size of COVID-19 in Korea
Source: PubMed Central journal article supplement (PMC7285447; doi:10.4178/epih.e2020011), 2020-03-12
Supplement: epih-42-e2020011-app4.pdf [file epih-42-e2020011-app4.pdf]

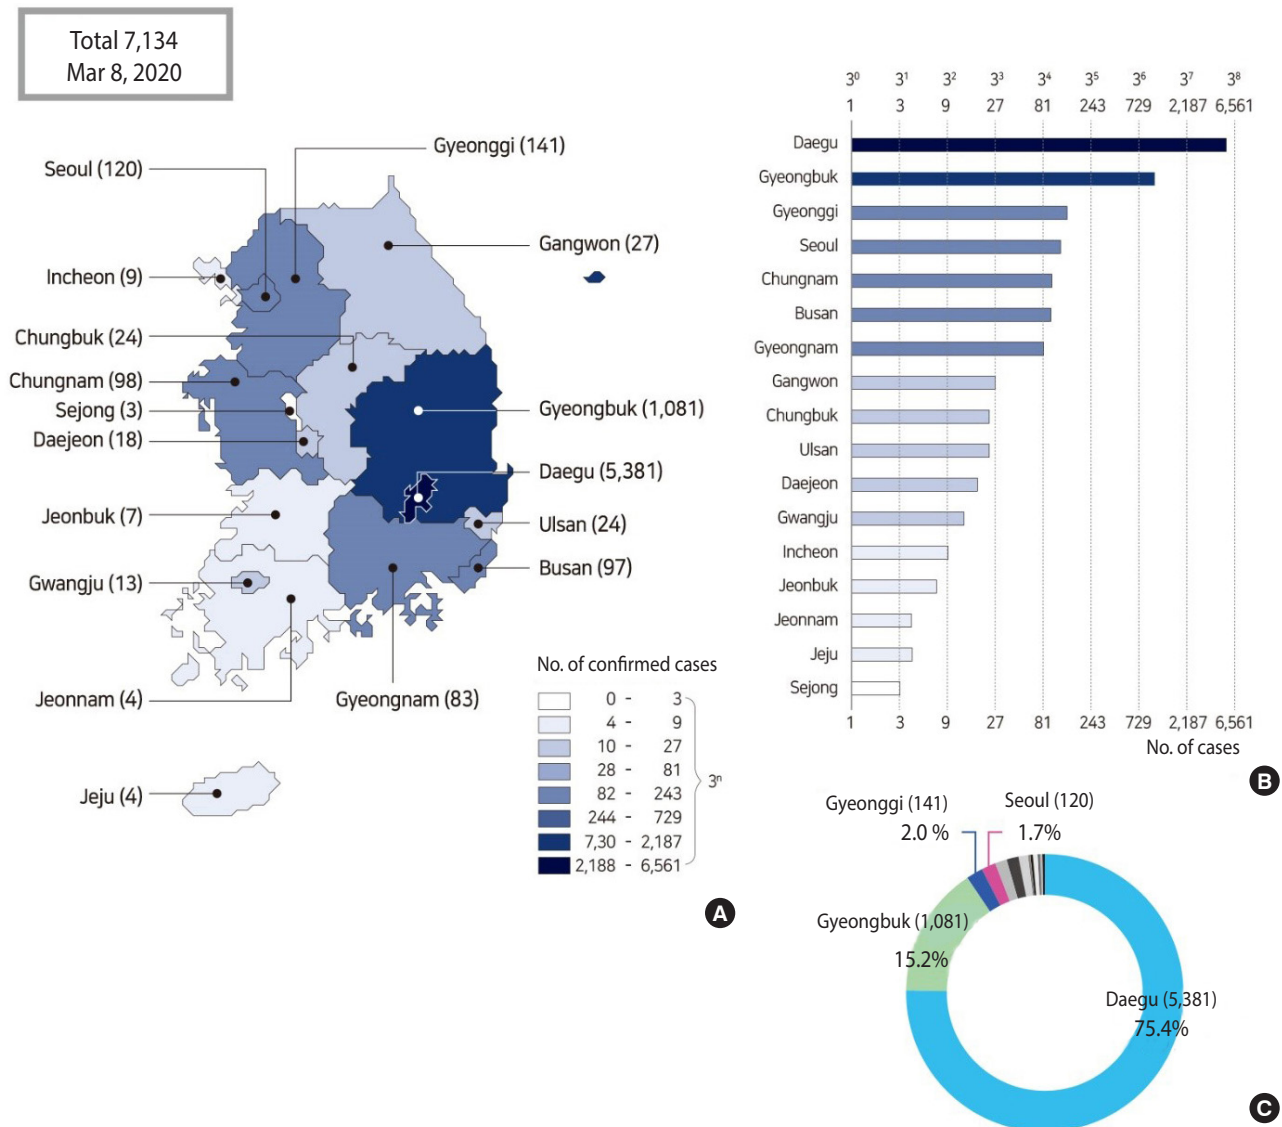

**Appendix 4.** Cumulative confirmed number of patients and ratio by region on March 8, 2020. (A) and (B) the national distribution of the cumulative confirmed cases in Korea; (C) the ratio of cumulative confirmed cases by region; Gyeongbuk is North Gyeongsang Province.
